# Supplementary figures and images for: Huanglian Decoction Suppresses the Growth of Hepatocellular Carcinoma Cells by Reducing CCNB1 Expression
Source: Preprints.org preprint supplement (doi:10.20944/preprints202011.0691.v1), 2020-11-27

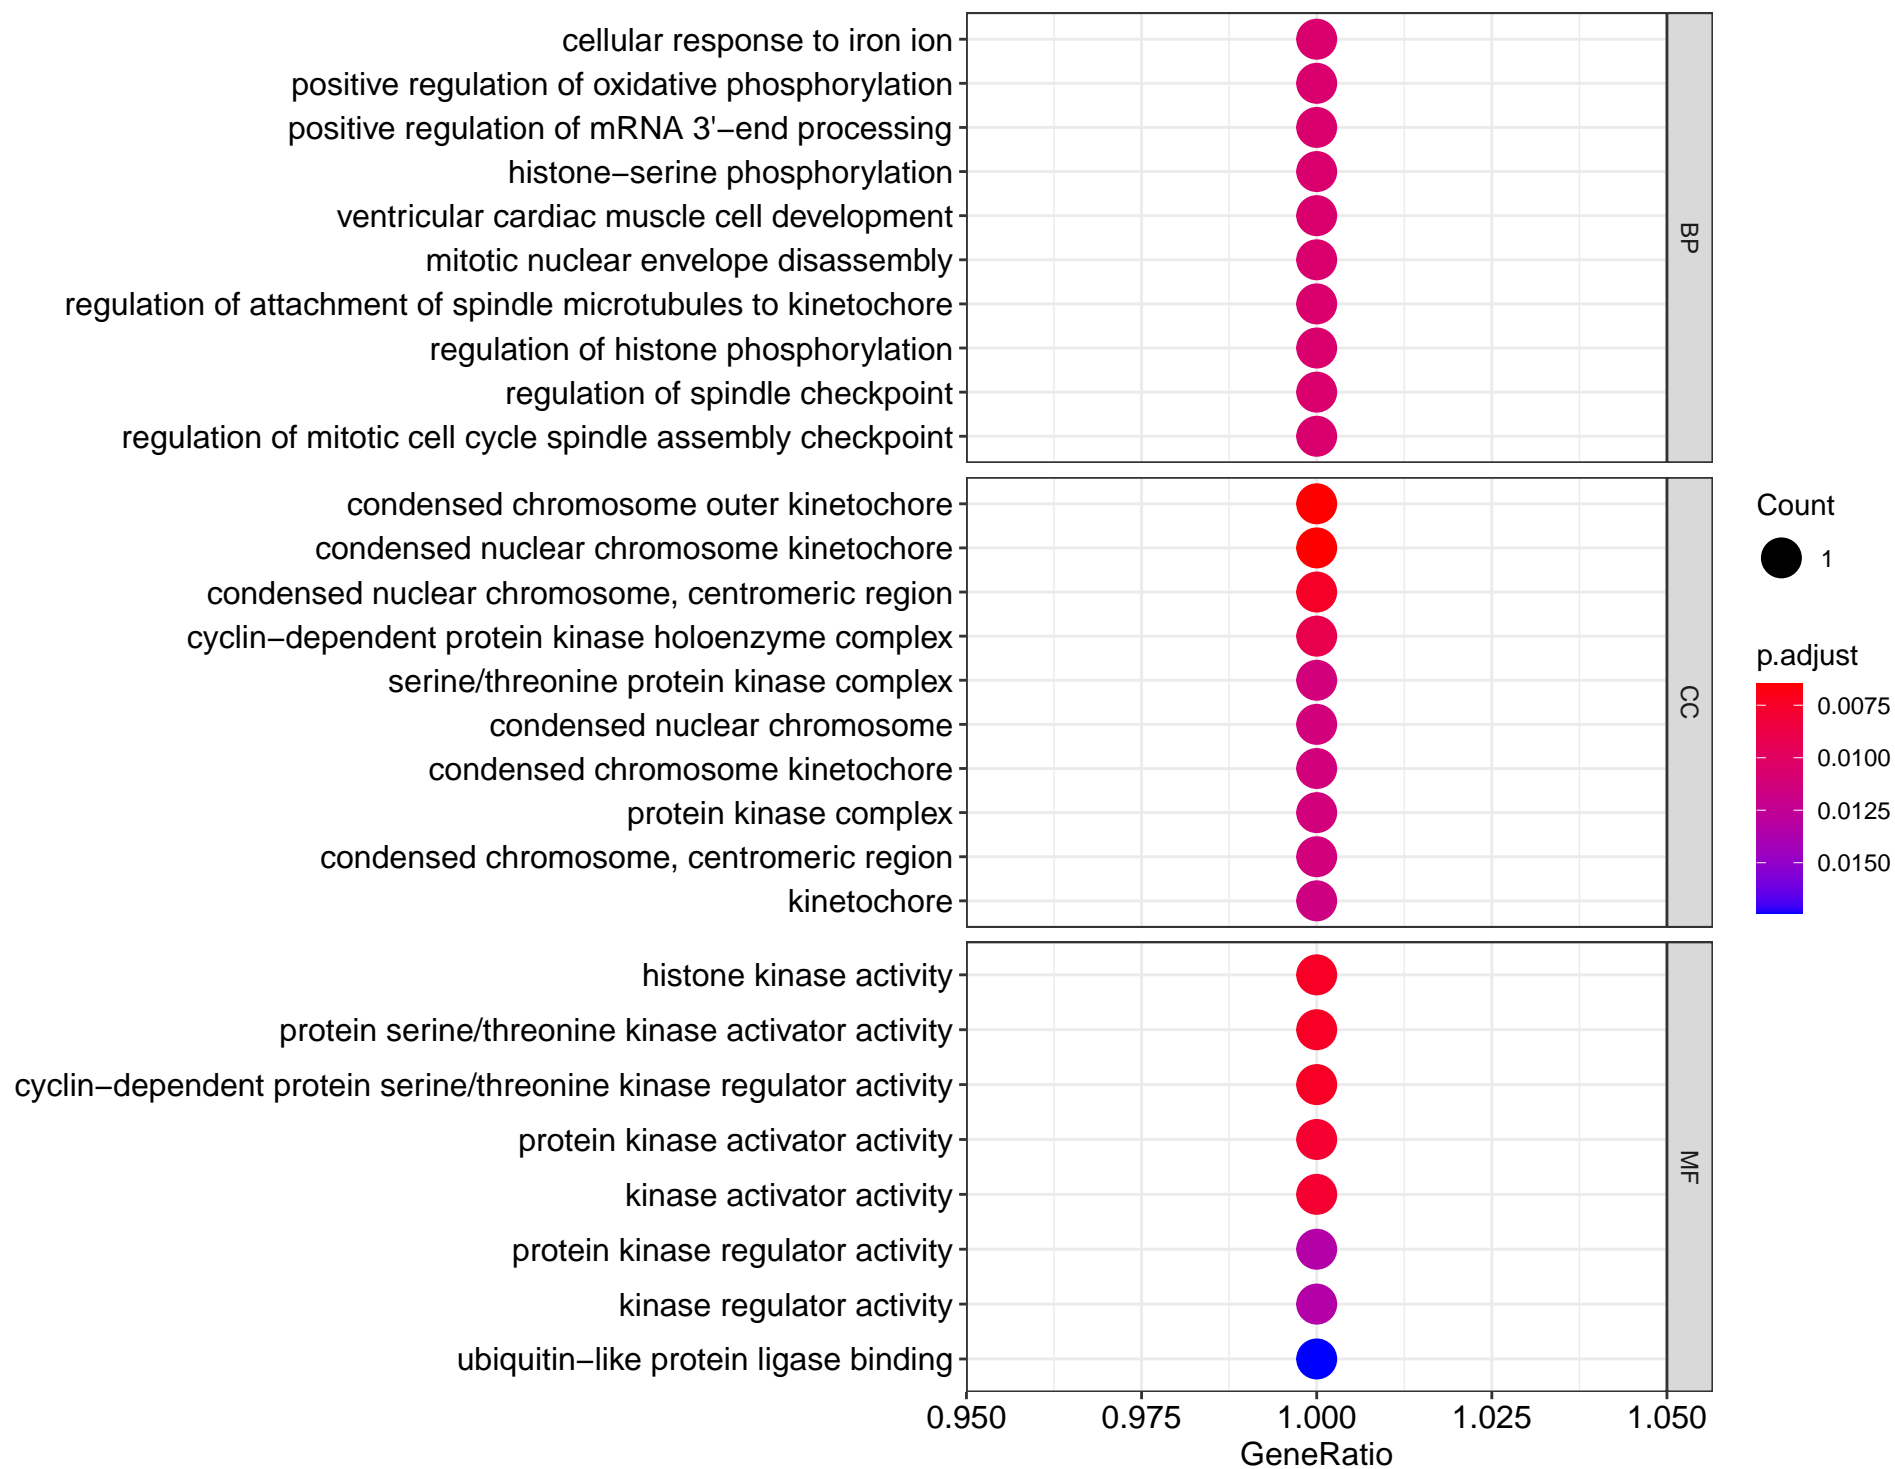

Supplement: Supplementary file 1 [file Supplementary%20Figure%20S1.pdf]

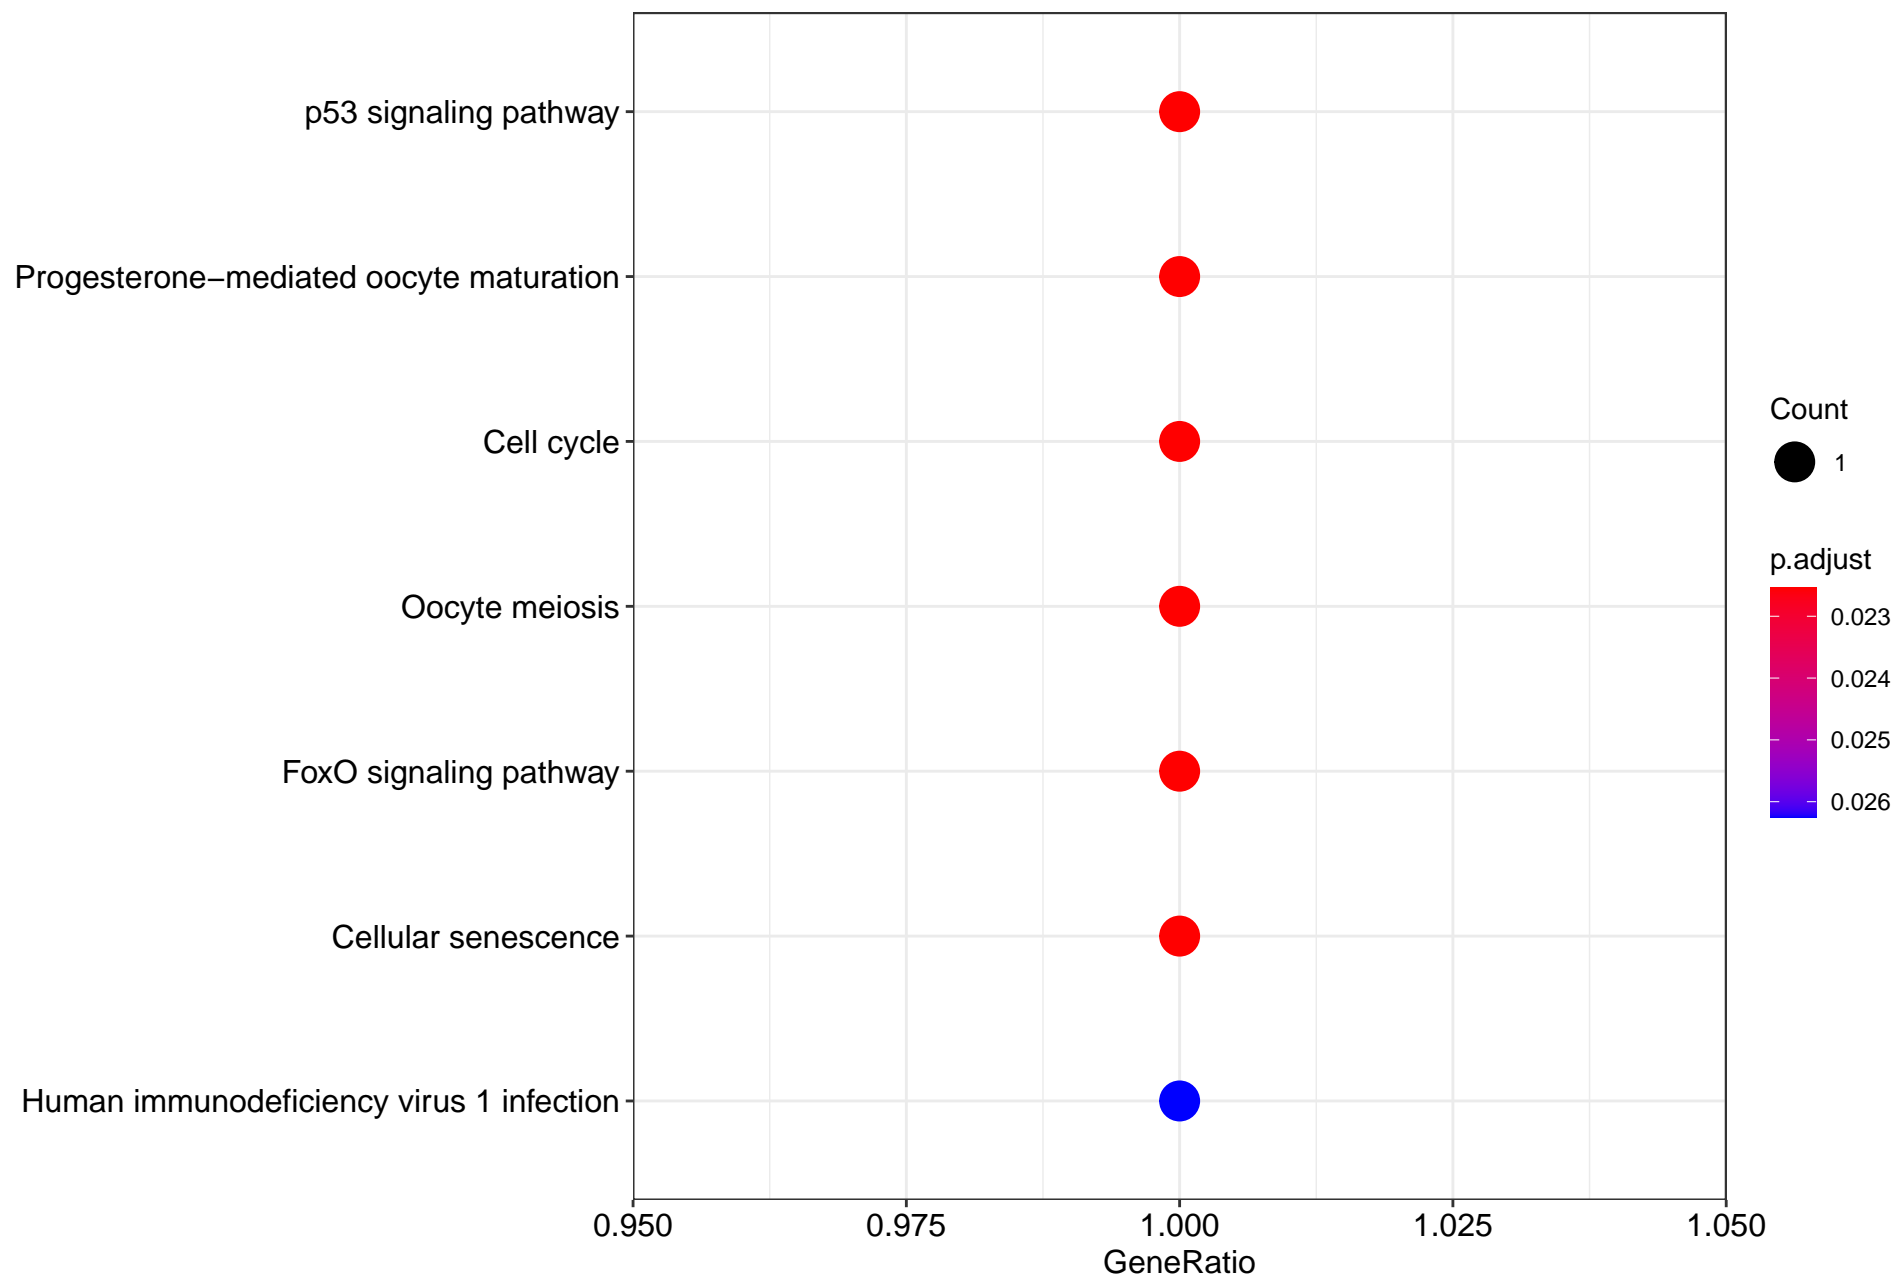

Supplement: Supplementary file 2 [file Supplementary%20Figure%20S2.pdf]
